Table S1. The pair-wise LD between 25 SNPs in the Tg gene

| SNP No. | SNP Name                            | Allele | Chromosome position<br>in NT_008046.15 | Location  | LD ( $r^2$ ) |       |       |       |       |       |       |       |       |       |       |       |       |       |       |       |       |       |       |       |       |       |       |       |
|---------|-------------------------------------|--------|----------------------------------------|-----------|--------------|-------|-------|-------|-------|-------|-------|-------|-------|-------|-------|-------|-------|-------|-------|-------|-------|-------|-------|-------|-------|-------|-------|-------|
|         |                                     |        |                                        |           | [01]         | [02]  | [03]  | [04]  | [05]  | [06]  | [07]  | [08]  | [09]  | [10]  | [11]  | [12]  | [13]  | [14]  | [15]  | [16]  | [17]  | [18]  | [19]  | [20]  | [21]  | [22]  | [23]  | [24]  |
| [01]    | -1984 <sup>a</sup>                  | C/T    | unknown                                | Promoter  |              |       |       |       |       |       |       |       |       |       |       |       |       |       |       |       |       |       |       |       |       |       |       |       |
| [02]    | -1714 <sup>a</sup>                  | G/A    | unknown                                | Promoter  | 0.299        |       |       |       |       |       |       |       |       |       |       |       |       |       |       |       |       |       |       |       |       |       |       |       |
| [03]    | rs180223 (E10SNP24 <sup>b</sup> )   | G/T    | 133969434                              | Exon 10   | 0.102        | 0.256 |       |       |       |       |       |       |       |       |       |       |       |       |       |       |       |       |       |       |       |       |       |       |
| [04]    | rs2069550 (E10SNP158 <sup>b</sup> ) | C/T    | 133969568                              | Exon 10   | 0.086        | 0.275 | 0.944 |       |       |       |       |       |       |       |       |       |       |       |       |       |       |       |       |       |       |       |       |       |
| [05]    | rs853326 (E12SNP <sup>b</sup> )     | G/A    | 133979156                              | Exon 12   | 0.104        | 0.251 | 0.915 | 0.919 |       |       |       |       |       |       |       |       |       |       |       |       |       |       |       |       |       |       |       |       |
| [06]    | rs2068128                           | C/T    | 133986770                              | Intron 16 | 0.278        | 0.100 | 0.010 | 0.006 | 0.011 |       |       |       |       |       |       |       |       |       |       |       |       |       |       |       |       |       |       |       |
| [07]    | rs2261147 (E18SNP-20 <sup>b</sup> ) | T/C    | 133989593                              | Intron 17 | 0.323        | 0.097 | 0.026 | 0.020 | 0.031 | 0.577 |       |       |       |       |       |       |       |       |       |       |       |       |       |       |       |       |       |       |
| [08]    | rs2069556 (E18SNP88 <sup>b</sup> )  | A/G    | 133989700                              | Exon 18   | 0.322        | 0.109 | 0.020 | 0.015 | 0.025 | 0.554 | 0.921 |       |       |       |       |       |       |       |       |       |       |       |       |       |       |       |       |       |
| [09]    | rs853304 (E21SNP <sup>b</sup> )     | T/C    | 134000930                              | Exon 21   | 0.336        | 0.109 | 0.025 | 0.019 | 0.030 | 0.600 | 0.962 | 0.938 |       |       |       |       |       |       |       |       |       |       |       |       |       |       |       |       |
| [10]    | rs2246624 (E27SNP <sup>b</sup> )    | T/C    | 134030173                              | Intron 26 | 0.033        | 0.063 | 0.236 | 0.232 | 0.240 | 0.043 | 0.098 | 0.090 | 0.102 |       |       |       |       |       |       |       |       |       |       |       |       |       |       |       |
| [11]    | rs2069561 (E29SNP <sup>b</sup> )    | G/A    | 134044465                              | Exon 29   | 0.326        | 0.117 | 0.015 | 0.010 | 0.021 | 0.499 | 0.835 | 0.812 | 0.858 | 0.109 |       |       |       |       |       |       |       |       |       |       |       |       |       |       |
| [12]    | rs7829428                           | A/G    | 134048293                              | Intron 30 | 0.107        | 0.205 | 0.049 | 0.054 | 0.042 | 0.342 | 0.321 | 0.316 | 0.345 | 0.120 | 0.367 |       |       |       |       |       |       |       |       |       |       |       |       |       |
| [13]    | rs2687809                           | G/A    | 134050687                              | Intron 31 | 0.015        | 0.003 | 0.003 | 0.003 | 0.003 | 0.001 | 0.003 | 0.001 | 0.002 | 0.004 | 0.001 | 0.001 |       |       |       |       |       |       |       |       |       |       |       |       |
| [14]    | rs2076740 (E33SNP <sup>b</sup> )    | C/T    | 134053240                              | Exon 33   | 0.022        | 0.002 | 0.005 | 0.007 | 0.005 | 0.003 | 0.000 | 0.000 | 0.000 | 0.009 | 0.000 | 0.005 | 0.028 |       |       |       |       |       |       |       |       |       |       |       |
| [15]    | rs10505604                          | A/G    | 134096770                              | Intron 37 | 0.019        | 0.006 | 0.000 | 0.000 | 0.000 | 0.000 | 0.002 | 0.002 | 0.003 | 0.001 | 0.003 | 0.002 | 0.374 |       |       |       |       |       |       |       |       |       |       |       |
| [16]    | rs3739266                           | T/C    | 134119860                              | Intron 41 | 0.011        | 0.008 | 0.001 | 0.001 | 0.000 | 0.000 | 0.001 | 0.001 | 0.002 | 0.000 | 0.003 | 0.001 | 0.015 | 0.267 | 0.793 |       |       |       |       |       |       |       |       |       |
| [17]    | rs2256366                           | T/C    | 134126284                              | Intron 41 | 0.000        | 0.007 | 0.007 | 0.007 | 0.005 | 0.000 | 0.000 | 0.000 | 0.000 | 0.000 | 0.001 | 0.000 | 0.029 | 0.037 | 0.084 | 0.112 |       |       |       |       |       |       |       |       |
| [18]    | rs2253035                           | G/C    | 134130242                              | Intron 41 | 0.008        | 0.014 | 0.002 | 0.001 | 0.001 | 0.000 | 0.000 | 0.001 | 0.000 | 0.004 | 0.001 | 0.000 | 0.005 | 0.093 | 0.297 | 0.353 | 0.269 |       |       |       |       |       |       |       |
| [19]    | rs2687836                           | C/T    | 134131448                              | Intron 41 | 0.000        | 0.007 | 0.008 | 0.008 | 0.008 | 0.000 | 0.000 | 0.001 | 0.000 | 0.000 | 0.002 | 0.001 | 0.022 | 0.030 | 0.070 | 0.095 | 0.793 | 0.315 |       |       |       |       |       |       |
| [20]    | rs2252696                           | C/A    | 134132714                              | Intron 41 | 0.004        | 0.000 | 0.005 | 0.005 | 0.004 | 0.004 | 0.000 | 0.000 | 0.000 | 0.001 | 0.002 | 0.002 | 0.007 | 0.000 | 0.007 | 0.004 | 0.204 | 0.023 | 0.091 |       |       |       |       |       |
| [21]    | rs1124527                           | A/C    | 134143287                              | Intron 41 | 0.002        | 0.005 | 0.003 | 0.003 | 0.003 | 0.000 | 0.000 | 0.000 | 0.000 | 0.000 | 0.001 | 0.002 | 0.027 | 0.003 | 0.016 | 0.025 | 0.450 | 0.094 | 0.340 | 0.310 |       |       |       |       |
| [22]    | rs2256476                           | T/G    | 134176318                              | Intron 41 | 0.005        | 0.001 | 0.000 | 0.000 | 0.000 | 0.002 | 0.006 | 0.009 | 0.007 | 0.001 | 0.003 | 0.001 | 0.021 | 0.008 | 0.008 | 0.013 | 0.425 | 0.046 | 0.316 | 0.184 | 0.618 |       |       |       |
| [23]    | rs2069568 (E43SNP4 <sup>b</sup> )   | C/T    | 134177635                              | Exon 43   | 0.004        | 0.001 | 0.000 | 0.000 | 0.000 | 0.002 | 0.003 | 0.004 | 0.003 | 0.000 | 0.001 | 0.000 | 0.018 | 0.003 | 0.002 | 0.005 | 0.279 | 0.008 | 0.184 | 0.164 | 0.419 | 0.707 |       |       |
| [24]    | rs2069569 (E43SNP97 <sup>b</sup> )  | T/C    | 134177728                              | Exon 43   | 0.002        | 0.001 | 0.001 | 0.001 | 0.002 | 0.008 | 0.010 | 0.010 | 0.009 | 0.002 | 0.003 | 0.001 | 0.014 | 0.000 | 0.018 | 0.013 | 0.194 | 0.054 | 0.086 | 0.302 | 0.203 | 0.401 | 0.550 |       |
| [25]    | rs2294024 (E46SNP <sup>b</sup> )    | C/T    | 134213295                              | Exon 46   | 0.000        | 0.002 | 0.001 | 0.002 | 0.001 | 0.003 | 0.001 | 0.001 | 0.001 | 0.004 | 0.001 | 0.001 | 0.005 | 0.007 | 0.056 | 0.067 | 0.052 | 0.193 | 0.070 | 0.010 | 0.130 | 0.162 | 0.239 | 0.034 |

<sup>a</sup>SNP numbers corresponding to those in reported by Stefan et al. (34).

<sup>b</sup>SNP numbers corresponding to those in reported by Ban et al. (23).
